# Supplementary material for: Sheet-like silicalite-1 single crystals with embedded macropores displaying superior catalytic performance
Source: Royal Society of Chemistry journal article supplement (doi:10.1039/d3qi01712e), 2023-01-01
Supplement: d3qi01712e1.pdf [file d3qi01712e1.pdf]

## Supporting Information

# Sheet-like Silicalite-1 Single Crystals with Embedded Macropores Displaying Superior Catalytic Performance

Yanfei Zhang<sup>1\*</sup>, Liang Qi<sup>2</sup>, Xiaomin Zhang<sup>3</sup>, Qike Jiang<sup>4</sup>, Peng Lu<sup>5</sup>, Lei Xu<sup>3\*</sup>, and  
Alexis T. Bell<sup>6,7</sup>

<sup>1</sup> Green Shipping and Carbon Neutrality Lab, College of Environmental Science and Engineering, Dalian Maritime University, Dalian 116026, China

<sup>2</sup> National Engineering Research Center of Lower-Carbon Catalysis Technology, Dalian National Laboratory for Clean Energy, Dalian Institute of Chemical Physics, Chinese Academy of Sciences, Dalian 116023, China.

<sup>3</sup> Dalian National Laboratory for Clean Energy, Dalian Institute of Chemical Physics, Chinese Academy of Sciences, Dalian 116023, China.

<sup>4</sup> Instrumentation and Service Center for Physical Sciences, Westlake University, Hangzhou, 310024, China.

<sup>5</sup> Qingdao Institute of Bioenergy and Bioprocess Technology, Chinese Academy of Sciences, Qingdao 266101, China.

<sup>6</sup> Chemical Sciences Division, Lawrence Berkeley National Laboratory, Berkeley, California 94720, United States.

<sup>7</sup> Department of Chemical and Biomolecular Engineering, University of California, Berkeley, Berkeley, California 94720, United States.

**Table S1** Precursors' compositions and crystallization conditions

| Samples            | Precursors' compositions (mol ratio) |                                   |                       | Crystallization temperature (K) |
|--------------------|--------------------------------------|-----------------------------------|-----------------------|---------------------------------|
|                    | TPAOH/SiO <sub>2</sub>               | H <sub>2</sub> O/SiO <sub>2</sub> | urea/SiO <sub>2</sub> |                                 |
| HMS-S1             | 0.17                                 | 0.9                               | 1.0                   | 423                             |
| HMS-S2             | 0.17                                 | 1.8                               | 1.0                   | 423                             |
| HMS-Silicalite-1.0 | 0.17                                 | 2.3                               | 1.0                   | 423                             |
| HMS-S3             | 0.17                                 | 2.7                               | 1.0                   | 423                             |
| HMS-S4             | 0.17                                 | 1.5                               | 0.8                   | 423                             |
| HMS-Silicalite-0.8 | 0.17                                 | 1.8                               | 0.8                   | 423                             |
| HMS-S5             | 0.17                                 | 2.1                               | 0.8                   | 423                             |
| HMS-S6             | 0.17                                 | 0.9                               | 0.5                   | 423                             |
| HMS-Silicalite-0.5 | 0.17                                 | 1.5                               | 0.5                   | 423                             |
| HMS-S7             | 0.17                                 | 1.8                               | 0.5                   | 423                             |

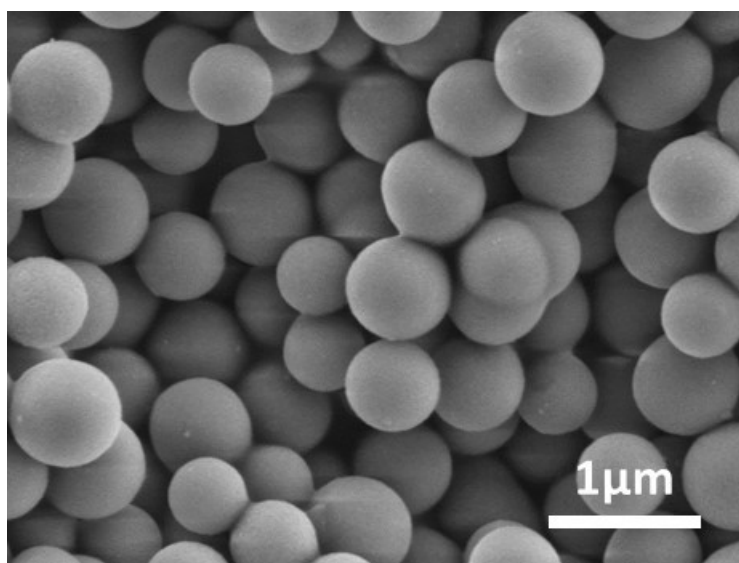**Fig. S1** SEM image of mesoporous silica spheres (MSS)

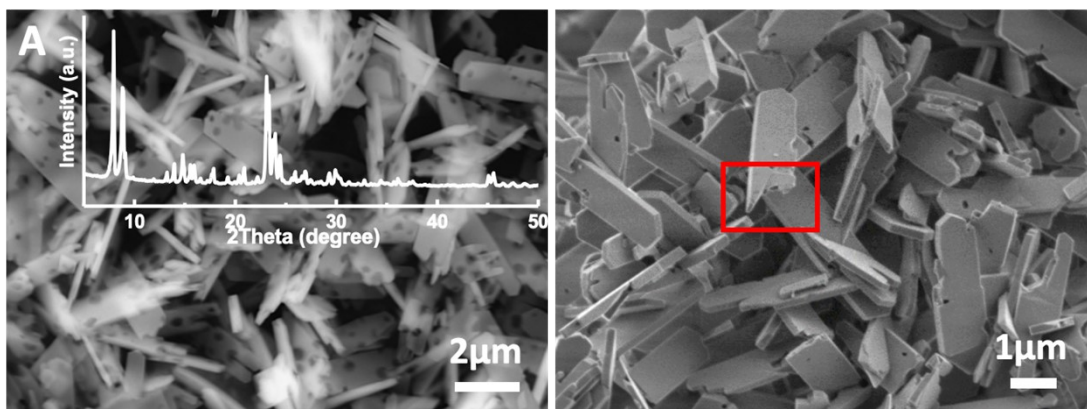

Fig. S2 XRD pattern and SEM image recorded with high (A) and low (B) accelerating voltage of HMS-Silicalite-1-1.0.

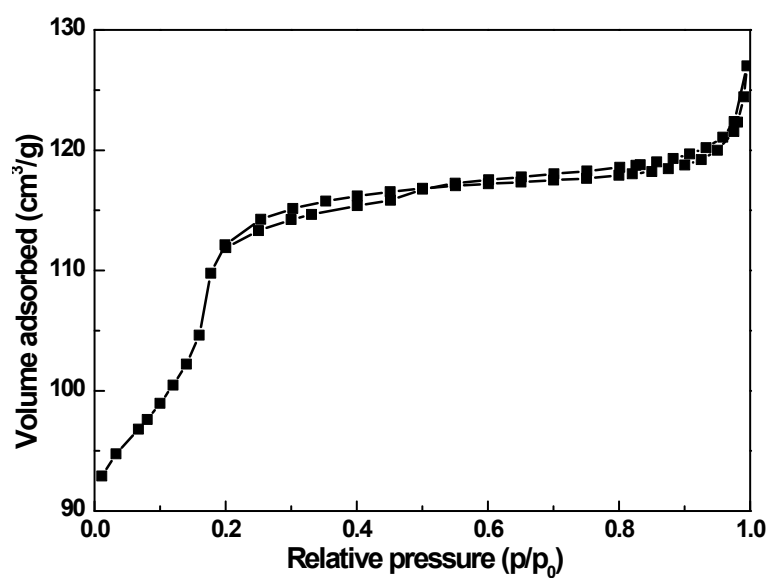

Fig. S3 N<sub>2</sub> adsorption-desorption isotherms of HMS-Silicalite-1-1.0

**Table S2** Textural properties of samples HMS-Silicalite-1

| Samples              | Surface area (m <sup>2</sup> /g) |                  |                  | Pore volume (cm <sup>3</sup> /g) |                    |
|----------------------|----------------------------------|------------------|------------------|----------------------------------|--------------------|
|                      | S <sub>BET</sub>                 | S <sub>mic</sub> | S <sub>ext</sub> | V <sub>mic</sub>                 | V <sub>total</sub> |
| HMS-Silicalite-1-1.0 | 389                              | 283              | 106              | 0.115                            | 0.188              |
| HMS-Silicalite-1-0.8 | 396                              | 294              | 102              | 0.116                            | 0.186              |
| HMS-Silicalite-1-0.5 | 399                              | 293              | 106              | 0.122                            | 0.194              |

<sup>a</sup> S<sub>BET</sub> (total surface area) calculated by applying BET equation. <sup>b</sup> S<sub>mic</sub> (micropore area), V<sub>mic</sub> (micropore volume) and S<sub>ext</sub> (external surface area) measured by the *t*-plot method. <sup>c</sup> V<sub>total</sub> (total volume) estimated at relative pressure of 0.99.

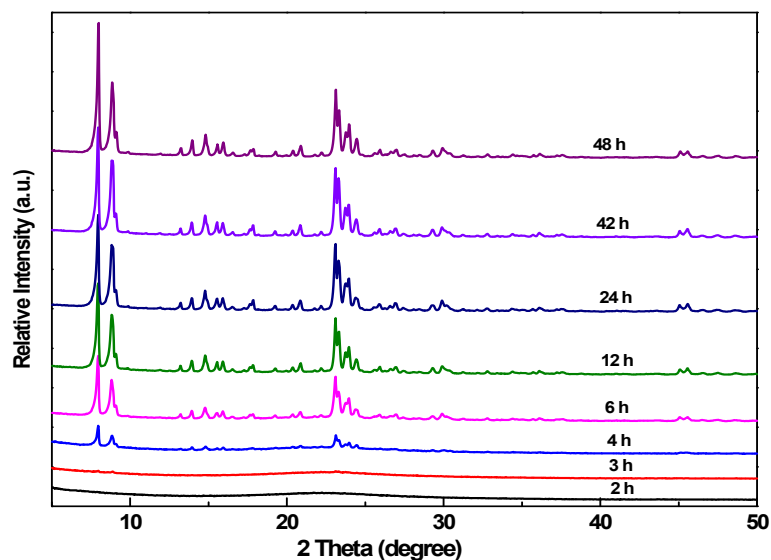**Fig. S4** XRD patterns of the products synthesized from MSS by urea-assisted dry-gel conversion method for different crystallization time, urea/SiO<sub>2</sub> = 1.0

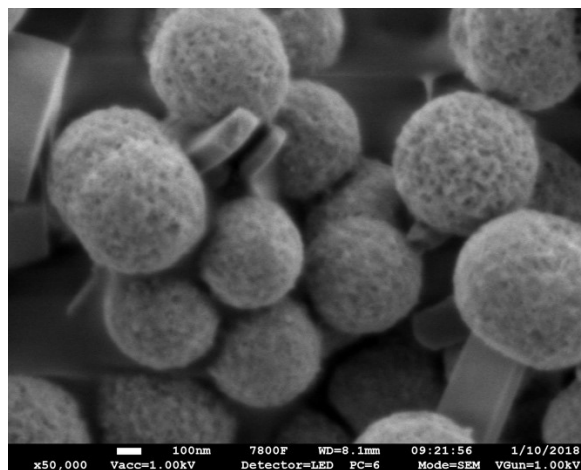

**Fig. S5** High-resolution SEM image of the samples synthesized from MSS by urea-assisted dry-gel conversion method for 4 h, image was recorded at voltage of 1 kV

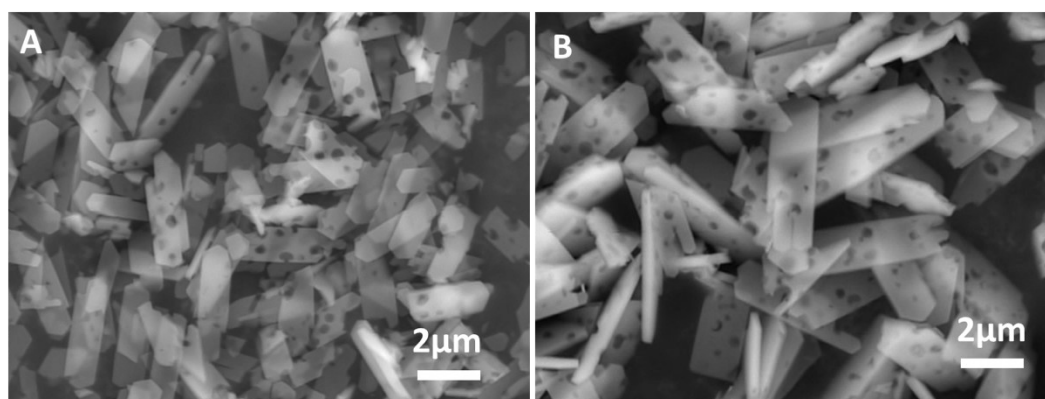

**Fig. S6** SEM images of the samples synthesized from MSS by urea-assisted dry-gel conversion method for (A) 12 h and (B) 42 h, images were recorded at voltage of 15 kV

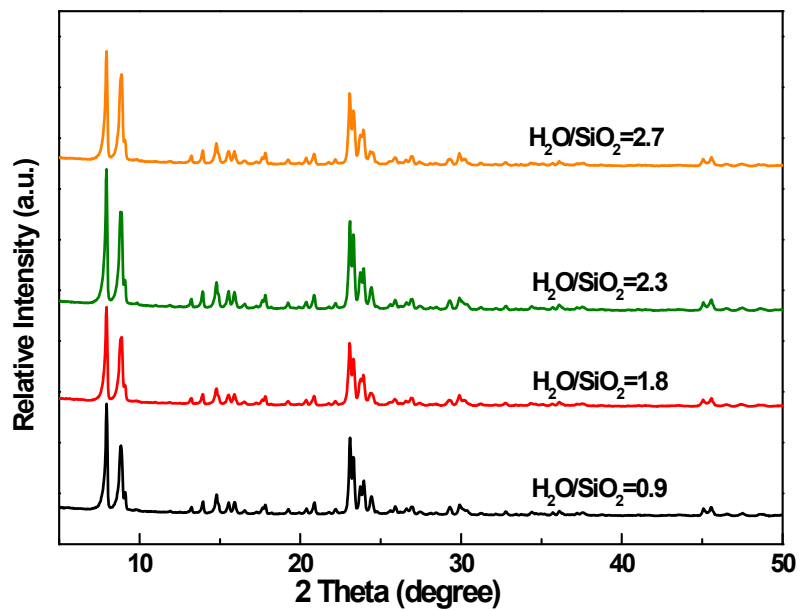

**Fig. S7** XRD patterns of samples synthesized with different  $\text{H}_2\text{O}/\text{SiO}_2$  ratios at  $\text{urea}/\text{SiO}_2 = 1.0$

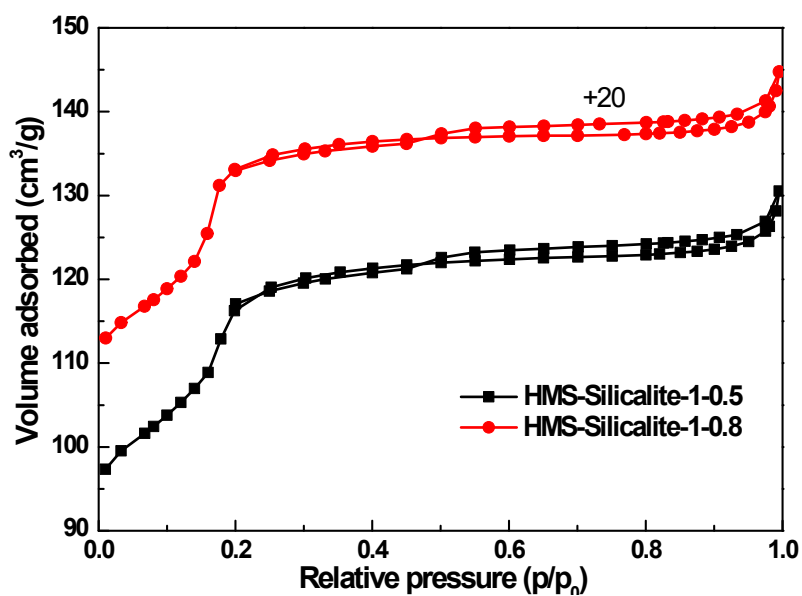

**Fig. S8**  $\text{N}_2$  adsorption-desorption isotherms of samples HMS-Silicalite-1-0.5 and HMS-Silicalite-1-0.8

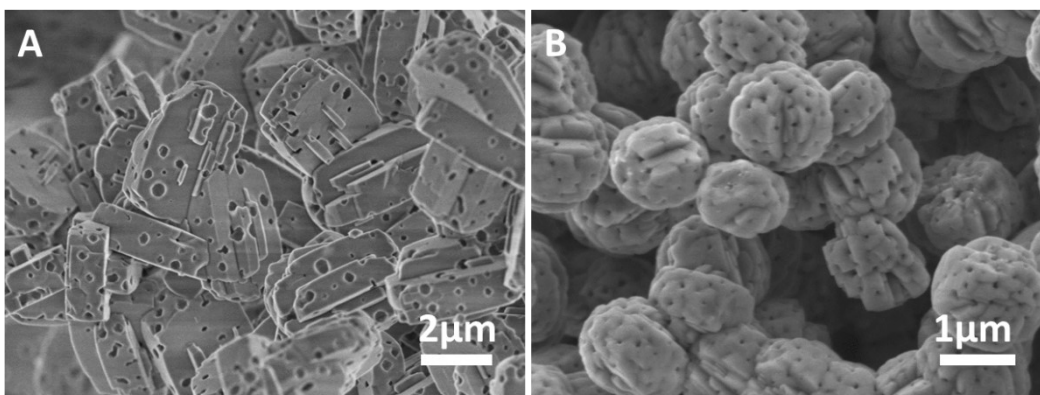

Fig. S9 SEM images of samples (A) HM-Silicalite-1(500) and (B) HM-Silicalite-1(150)

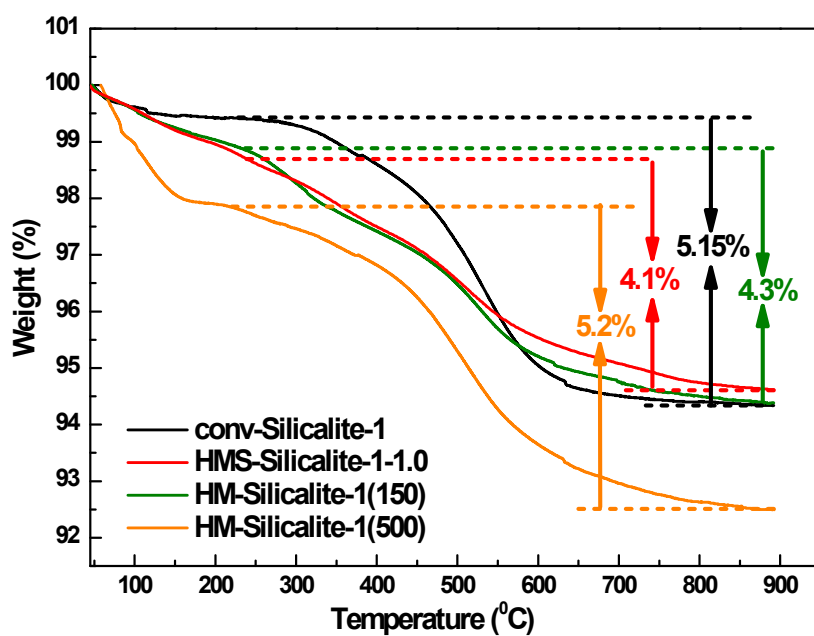

Fig. S10 TGA curves of Silicalite-1 samples after the vapor-phase Beckmann rearrangement of cyclohexanone oxime for 57 h
